# Supplementary material for: Evaluation of the diagnostic performance of laboratory-based c-reactive protein as a triage test for active pulmonary tuberculosis
Source: PubMed Central journal article supplement (PMC8274836; doi:10.1371/journal.pone.0254002), 2021-07-12
Supplement: pone.0254002.s006.pdf [file pone.0254002.s006.pdf]

| Patient Characteristics |                                                     | N (participants with Xpert MTB/Rif results =527) |                |
|-------------------------|-----------------------------------------------------|--------------------------------------------------|----------------|
|                         |                                                     | TB+<br>(n=183)                                   | TB-<br>(n=344) |
| <b>Age</b>              | Median (IQR)                                        | 33 (25-42)                                       | 39 (31-54)     |
| <b>Sex</b>              | Female (%)                                          | 65 (35.5)                                        | 170 (49.4)     |
|                         | Male (%)                                            | 118 (64.5)                                       | 174 (50.6)     |
| <b>Smear status</b>     | S+C+<br>(% of XRS-defined TB cases)                 | 156 (85.2)                                       |                |
|                         | S-C+<br>(% of XRS-defined TB cases)                 | 27 (14.8)                                        |                |
| <b>HIV status</b>       | Positive (% of patients with known HIV status)      | 72 (40.2)                                        | 101 (31.3)     |
|                         | Negative (% of patients with known HIV status)      | 107 (59.8)                                       | 224 (68.7)     |
|                         | Unknown (% of total)                                | 4 (2.2)                                          | 19 (5.5)       |
| <b>CD4 Count</b>        | <200 (% with CD4 count)                             | 24 (61.5)                                        | 14 (35.0)      |
|                         | >=200 (% with CD4 count)                            | 15 (38.5)                                        | 26 (65.0)      |
|                         | Unknown                                             | 33                                               | 61             |
|                         | Median CD4 count (IQR)                              | 114 (70-360)                                     | 279 (131-475)  |
| <b>History of BCG</b>   | Positive history of vaccination or scar present (%) | 87 (47.5)                                        | 182 (52.9)     |
|                         | Negative history of vaccination (%)                 | 32 (17.5)                                        | 76 (22.1)      |

|                                           |                                                           |            |            |
|-------------------------------------------|-----------------------------------------------------------|------------|------------|
|                                           | Unknown history of vaccination and scar indeterminate (%) | 39 (21.3)  | 64 (18.6)  |
|                                           | Not obtained (%)                                          | 25 (13.7)  | 22 (6.4)   |
| <b>Prior history of TB</b>                | Positive (%)                                              | 48 (26.2)  | 98 (28.5)  |
|                                           | Negative (%)                                              | 132 (72.1) | 244 (70.9) |
|                                           | Unknown (%)                                               | 3 (1.6)    | 2 (0.6)    |
| <b>QuantiFERON result</b>                 | Positive (% with result)                                  | 62 (79.5)  | 5 (4.0)    |
|                                           | Negative (% with result)                                  | 12 (15.4)  | 99 (78.6)  |
|                                           | Indeterminate (% with result)                             | 4 (5.1)    | 22 (17.5)  |
|                                           | Not obtained                                              | 105        | 218        |
| <b>Site of Study</b>                      | Cambodia (%)                                              | 24 (13.1)  | 24 (7.0)   |
|                                           | Georgia (%)                                               | 25 (13.7)  | 22 (6.4)   |
|                                           | Peru (%)                                                  | 63 (34.4)  | 119 (34.6) |
|                                           | South Africa (%)                                          | 54 (29.5)  | 75 (21.8)  |
|                                           | Viet Nam (%)                                              | 17 (9.3)   | 104 (30.2) |
| <b>Number of symptoms at presentation</b> | 1 (%)                                                     | 7 (3)      | 101 (33)   |
|                                           | 2-3 (%)                                                   | 109 (49)   | 142 (46)   |
|                                           | 4+ (%)                                                    | 105 (48)   | 63 (21)    |
| <b>Symptom at presentation</b>            | Cough (%)                                                 | 218 (99)   | 295 (96)   |
|                                           | Haemoptysis (%)                                           | 47 (21)    | 31 (10)    |
|                                           | Fever (%)                                                 | 150 (68)   | 139 (45)   |
|                                           | Night Sweats (%)                                          | 156 (71)   | 120 (39)   |
|                                           | Recent weight loss (%)                                    | 165 (75)   | 134 (44)   |
