# Supplementary material for: Evaluation of the diagnostic performance of laboratory-based c-reactive protein as a triage test for active pulmonary tuberculosis
Source: PubMed Central journal article supplement (PMC8274836; doi:10.1371/journal.pone.0254002), 2021-07-12
Supplement: pone.0254002.s007.pdf [file pone.0254002.s007.pdf]

| Variable<br><br>(n/N)           |                   | CRP ≥8mg/L          |                     | CRP ≥10mg/L         |                     | AUC (95%CI)      |
|---------------------------------|-------------------|---------------------|---------------------|---------------------|---------------------|------------------|
|                                 |                   | Sensitivity (95%CI) | Specificity (95%CI) | Sensitivity (95%CI) | Specificity (95%CI) |                  |
| <b>Overall</b><br><br>(183/527) |                   | 90.7 (85.6-94.1)    | 57.3 (52.0-62.4)    | 89.6 (84.4-93.3)    | 60.8 (55.5-65.8)    | 0.83 (0.79-0.87) |
| <b>By study site</b>            |                   |                     |                     |                     |                     |                  |
| (24/48)                         | Cambodia          | 75.0 (55.1-88.0)    | 29.2 (14.9-49.2)    | 75.0 (55.1-88.0)    | 29.2 (14.9-49.2)    | 0.53 (0.36-0.70) |
| (25/47)                         | Georgia           | 88.0 (70.0-95.8)    | 63.6 (43.0-80.3)    | 88.0 (70.0-95.8)    | 63.6 (43.0-80.3)    | 0.83 (0.71-0.95) |
| (63/182)                        | Peru              | 90.5 (80.7-95.6)    | 72.3 (63.6-79.5)    | 88.9 (78.8-94.5)    | 76.5 (68.1-83.2)    | 0.87 (0.81-0.93) |
| (54/129)                        | South Africa      | 96.3 (87.4-99.0)    | 40.0 (29.7-51.3)    | 94.4 (84.9-98.1)    | 44.0 (33.3-55.3)    | 0.83 (0.76-0.90) |
| (17/121)                        | Vietnam           | 100 (81.6-100)      | 57.7 (48.1-66.7)    | 100 (81.6-100)      | 61.5 (51.9-70.3)    | 0.90 (0.84-0.96) |
| <b>Smear Status</b>             |                   |                     |                     |                     |                     |                  |
| (156/500)                       | Smear + (Xpert+)  | 92.9 (87.8-96.0)    | 60.3 (54.8-65.6)    | 92.3 (87.0-95.5)    | 63.9 (58.4-69.0)    | 0.86 (0.83-0.90) |
| (27/371)                        | Smear - (Xpert +) | 77.8 (59.2-89.4)    | 57.6 (52.3-62.8)    | 74.1 (55.3-86.8)    | 61.2 (55.9-66.2)    | 0.71 (0.64-0.79) |
| <b>HIV status</b>               |                   |                     |                     |                     |                     |                  |
| (72/173)                        | Positive          | 95.8 (88.5-98.6)    | 42.6 (33.3-52.3)    | 95.8 (88.5-98.6)    | 46.5 (37.1-56.2)    | 0.84 (0.78-0.90) |
| (107/331)                       | Negative          | 88.8 (81.4-93.5)    | 63.4 (56.9-69.4)    | 86.9 (79.2-92.0)    | 67.0 (60.0-72.8)    | 0.83 (0.78-0.87) |

| Number of presenting symptoms |             |                  |                  |                  |                  |                  |
|-------------------------------|-------------|------------------|------------------|------------------|------------------|------------------|
| <i>(7/108)</i>                | 1 symptom   | 66.7 (20.8-93.9) | 77.1 (68.2-84.1) | 66.7 (20.8-93.9) | 80.0 (71.4-86.5) | 0.71 (0.38-1.00) |
| <i>(109/251)</i>              | 2-3 symptom | 87.4 (78.8-92.8) | 57.3 (49.7-64.6) | 85.1 (76.1-91.1) | 60.4 (52.7-67.5) | 0.79 (0.73-0.85) |
| <i>(105/168)</i>              | 4+ symptom  | 94.6 (88.0-97.7) | 29.3 (20.2-40.4) | 94.6 (88.0-97.7) | 34.7 (24.9-45.9) | 0.79 (0.72-0.85) |
