# Supplementary material for: Evaluation of the diagnostic performance of laboratory-based c-reactive protein as a triage test for active pulmonary tuberculosis
Source: PubMed Central journal article supplement (PMC8274836; doi:10.1371/journal.pone.0254002), 2021-07-12
Supplement: pone.0254002.s008.pdf [file pone.0254002.s008.pdf]

| Variable       |             | CRP cutoff-point (mg/L) |      |      |      |      |      |      |      |
|----------------|-------------|-------------------------|------|------|------|------|------|------|------|
|                |             | 2                       | 4    | 6    | 8    | 10   | 12   | 14   | 18   |
| <b>Overall</b> | Sensitivity | 96.2                    | 95.1 | 93.4 | 90.7 | 89.6 | 86.9 | 85.3 | 84.7 |
|                | Specificity | 30.2                    | 42.4 | 52.9 | 57.3 | 60.8 | 64.0 | 65.7 | 69.5 |
|                |             |                         |      |      |      |      |      |      |      |
|                |             | 2                       | 4    | 6    | 8    | 10   | 12   | 20   | 30   |
|                |             |                         |      |      |      |      |      |      |      |
| <b>HIV+</b>    | Sensitivity | 98.6                    | 98.6 | 98.6 | 95.8 | 95.8 | 94.4 | 93.1 | 87.5 |
|                | Specificity | 16.8                    | 26.7 | 38.6 | 42.6 | 46.5 | 48.5 | 60.4 | 69.3 |
| <b>HIV-</b>    | Sensitivity | 95.3                    | 93.5 | 91.6 | 88.8 | 86.9 | 84.1 | 80.4 | 71.0 |
|                | Specificity | 36.6                    | 50.9 | 59.8 | 63.4 | 67.0 | 70.6 | 77.7 | 82.6 |
