# Supplementary material for: Evaluation of the diagnostic performance of laboratory-based c-reactive protein as a triage test for active pulmonary tuberculosis
Source: PubMed Central journal article supplement (PMC8274836; doi:10.1371/journal.pone.0254002), 2021-07-12
Supplement: pone.0254002.s009.pdf [file pone.0254002.s009.pdf]

| Study Site<br>(n/N) |              | CRP ≥8mg/L          |                     | CRP ≥10mg/L         |                     | AUC (95%CI)      |
|---------------------|--------------|---------------------|---------------------|---------------------|---------------------|------------------|
|                     |              | Sensitivity (95%CI) | Specificity (95%CI) | Sensitivity (95%CI) | Specificity (95%CI) |                  |
| (30/48)             | Cambodia     | 76.7 (59.1-88.2)    | 33.3 (16.3-56.3)    | 76.7 (59.1-88.2)    | 33.3 (16.3-56.3)    | 0.59 (0.42-0.77) |
| (30/47)             | Georgia      | 80.0 (62.7-90.5)    | 64.7 (41.3-82.7)    | 80.0 (62.7-90.5)    | 64.7 (41.3-82.7)    | 0.74 (0.59-0.86) |
| (125/263)           | Peru         | 87.2 (80.2-92.0)    | 79.7 (72.2-85.6)    | 86.4 (79.3-91.3)    | 83.3 (76.2-88.6)    | 0.90 (0.86-0.94) |
| (70/140)            | South Africa | 95.7 (88.1-98.5)    | 44.3 (33.2-55.9)    | 91.4 (82.5-96.0)    | 47.1 (35.9-58.7)    | 0.81 (0.74-0.89) |
| (136/2670)          | Vietnam      | 65.4 (57.1-72.9)    | 58.8 (50.2-66.8)    | 62.5 (54.1-70.2)    | 62.6 (54.1-70.4)    | 0.64 (.58-0.71)  |
