# Supplementary material for: Evaluation of the diagnostic performance of laboratory-based c-reactive protein as a triage test for active pulmonary tuberculosis
Source: PubMed Central journal article supplement (PMC8274836; doi:10.1371/journal.pone.0254002), 2021-07-12
Supplement: pone.0254002.s010.pdf [file pone.0254002.s010.pdf]

| Variable       |                     | CRP cutoff-point (mg/L) |      |      |      |      |      |      |      |
|----------------|---------------------|-------------------------|------|------|------|------|------|------|------|
|                |                     | 2                       | 4    | 6    | 8    | 10   | 12   | 14   | 18   |
| <b>Overall</b> | Sensitivity (95%CI) | 90.3                    | 85.4 | 83.1 | 79.8 | 77.8 | 76.0 | 73.4 | 70.3 |
|                | Specificity (95%CI) | 35.6                    | 48.1 | 58.8 | 62.8 | 66.0 | 69.5 | 70.6 | 73.8 |
|                |                     |                         |      |      |      |      |      |      |      |
|                |                     | 2                       | 4    | 6    | 8    | 10   | 12   | 18   | 24   |
| <b>HIV+</b>    | Sensitivity (95%CI) | 97.3                    | 96.4 | 96.4 | 93.7 | 91.9 | 91.0 | 86.5 | 84.7 |
|                | Specificity (95%CI) | 21.6                    | 33.3 | 46.1 | 49.0 | 52.9 | 54.9 | 59.8 | 69.6 |
| <b>HIV-</b>    | Sensitivity (95%CI) | 88.0                    | 81.4 | 78.5 | 74.8 | 72.6 | 70.8 | 64.6 | 58.8 |
|                | Specificity (95%CI) | 41.5                    | 55.3 | 64.4 | 68.0 | 71.2 | 75.1 | 78.7 | 83.0 |
