# Supplementary material for: Evaluation of the diagnostic performance of laboratory-based c-reactive protein as a triage test for active pulmonary tuberculosis
Source: PubMed Central journal article supplement (PMC8274836; doi:10.1371/journal.pone.0254002), 2021-07-12
Supplement: pone.0254002.s011.pdf [file pone.0254002.s011.pdf]

| Triage algorithm                   |    | Observations<br>(n) | % of n requiring a<br>confirmatory test | Sensitivity (95%CI) | Specificity (95%CI) |
|------------------------------------|----|---------------------|-----------------------------------------|---------------------|---------------------|
| <b>Xpert MTB/Rif alone</b>         |    | 527                 | 100%                                    | 82.8 (77.3-87.2)    | 100 (98.8-100)      |
| <b>Xpert Confirmation</b>          |    |                     |                                         |                     |                     |
| CRP threshold<br>(mg/L)            | 10 | 527                 | 56.7%                                   | 74.2 (68.1-79.5)    | 100 (98.8-100)      |
|                                    | 8  | 527                 | 59.4%                                   | 75.1 (69.0-80.4)    | 100 (98.8-100)      |
|                                    | 6  | 527                 | 63.2%                                   | 77.4 (71.4-82.4)    | 100 (98.8-100)      |
|                                    | 4  | 527                 | 70.6%                                   | 78.7 (72.9-83.6)    | 100 (98.8-100)      |
|                                    | 2  | 527                 | 78.9%                                   | 79.6 (73.8-84.4)    | 100 (98.8-100)      |
| <b>Liquid Culture confirmation</b> |    |                     |                                         |                     |                     |
| CRP threshold<br>(mg/L)            | 10 | 765                 | 56.3%                                   | 77.7 (73.4-81.6)    | 100 (99.0-100)      |
|                                    | 8  | 765                 | 59.0%                                   | 79.8 (75.5-83.5)    | 100 (99.0-100)      |
|                                    | 6  | 765                 | 62.6%                                   | 83.1 (79.1-86.5)    | 100 (99.0-100)      |
|                                    | 4  | 765                 | 69.0%                                   | 85.4 (81.6-88.6)    | 100 (99.0-100)      |
|                                    | 2  | 765                 | 77.6%                                   | 90.3 (86.9-92.8)    | 100 (99.0-100)      |
| <b>Chest X-ray triage</b>          |    |                     |                                         |                     |                     |
| CXR alone                          |    | 673                 | N/A                                     | 93.2(90.1-95.5)     | 63.1(57.8-68.1)     |
| CXR Xpert MTB/Rif                  |    | 463                 | 57.9%                                   | 76.8(70.3-82.3)     | 100 (98.6-100)      |
| CXR Liquid Culture                 |    | 673                 | 65.4%                                   | 93.2(90.1-95.5)     | 100 (98.9-100)      |
